# Supplementary material for: The Effect of Uncoated SPIONs on hiPSC-Differentiated Endothelial Cells
Source: Int J Mol Sci. 2019 Jul 19;20(14):3536. doi: 10.3390/ijms20143536 (PMC6678752; doi:10.3390/ijms20143536)
Supplement: Supplementary file 1 [file ijms-20-03536-s001.pdf]

## *Supplementary material*

### **The effect of uncoated SPIONs on hiPSC-differentiated endothelial cells**

*Barbara Salingova<sup>1</sup>, Pavel Simara<sup>1</sup>, Pavel Matula<sup>1</sup>, Lenka Zajickova<sup>2</sup>, Petr Synek<sup>3</sup>, Ondrej Jasek<sup>3</sup>, Lenka Veverkova<sup>4</sup>, Miroslava Sedlackova<sup>5</sup>, Zuzana Nichtova<sup>6</sup>, Irena Koutna<sup>1\*</sup>*

<sup>1</sup> Centre for Biomedical Image Analysis, Faculty of Informatics, Masaryk University, Kamenice 5, 625 00, Czech Republic

<sup>2</sup> RG Plasma Technologies, CEITEC – Masaryk University, Purkynova 656/123, 612 00, Czech Republic

<sup>3</sup> Department of Physical Electronics, Faculty of Science, Masaryk University, (Kotlarska 2, Brno 602 00, Czech Republic

<sup>4</sup> 1<sup>st</sup> Surgical Department, Faculty of Medicine, Masaryk University and St. Ann's Hospital, Pekarska 53, 656 91 Brno, Czech Republic

<sup>5</sup> Department of Histology and Embryology, Faculty of Medicine, Masaryk University, Kamenice 5, 625 00 Brno, Czech Republic

<sup>6</sup> Institute of Molecular Physiology and Genetics, Slovak Academy of Sciences, Dubravska cesta 9, 840 05 Bratislava, Slovak Republic

\*Correspondence: Assoc. prof. Irena Koutna PhD., [qkoutna@gmail.com](mailto:qkoutna@gmail.com) (+420) 549 493 976

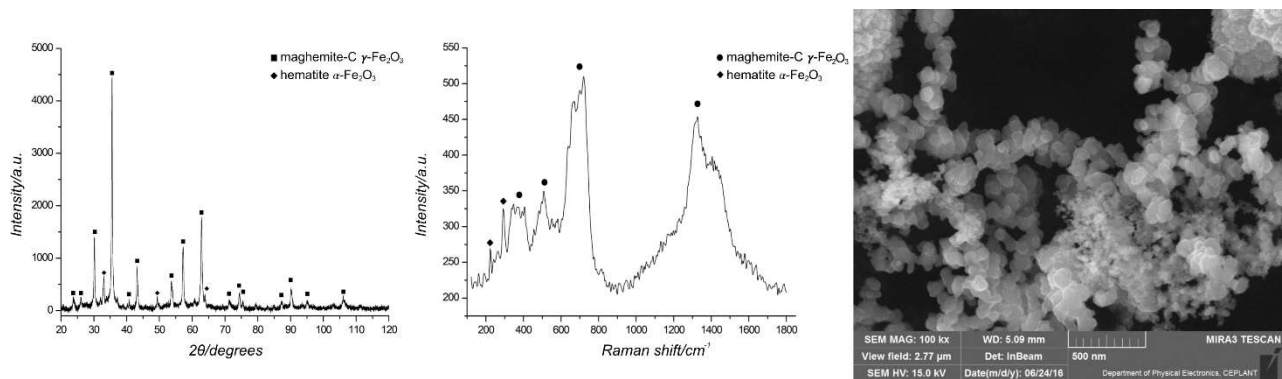

**Figure S1** Characterisation of the prepared uSPIONs. Left, sample diffraction pattern. Middle, phase composition of the prepared sample analyzed by Raman spectroscopy. Right, SEM of the synthesized uSPIONs (size: 20-50 nm). Abbreviations: SEM, scanning electron microscopy.

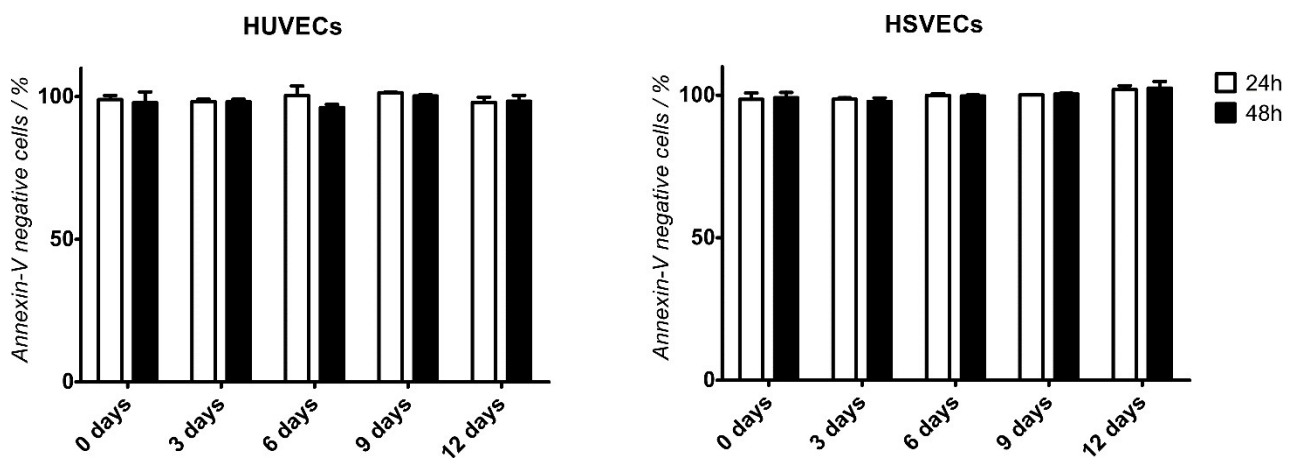

**Figure S2** Cell viability after incubation with uSPIONs assessed by Annexin assay. HSVECs and HUVECs were incubated with 10 μg/ml uSPIONs for 24 and 48 h and observed up to 12 days after incubation. Viability was assessed by annexin assay during passaging – every 3 days ( $N = \pm 3$  SEM). Viability was standardized to the control. The statistical evaluation ( $t$ -test) showed no significant difference in cell survival among the cell lines ( $p > 0.05$ ). Abbreviations: HUVECs, human umbilical vein endothelial cells; HSVECs, human saphenous vein endothelial cells.

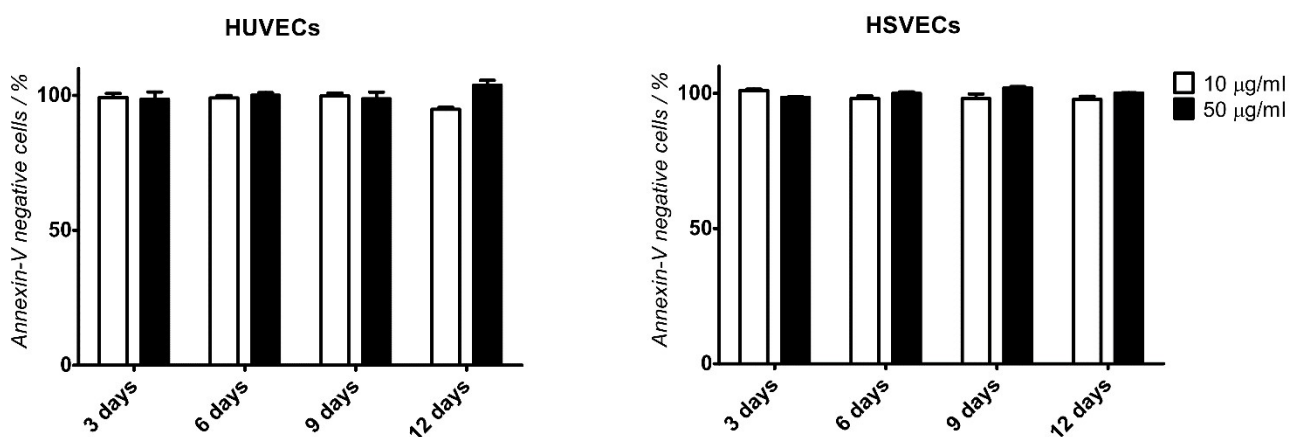

**Figure S3** Cell viability during long-term incubation with uSPIONs assessed by Annexin assay. HUVECs and HSVECs were incubated with 10 and 50 μg/ml uSPIONs for 3, 6, 9 and 12 days ( $N = \pm 3$  SEM). Viability was standardized to the control. The statistical evaluation ( $t$ -test) showed no significant difference in cell viability among the cell lines ( $p > 0.05$ ). Abbreviations: HUVECs, human umbilical vein endothelial cells; HSVECs, human saphenous vein endothelial cells.

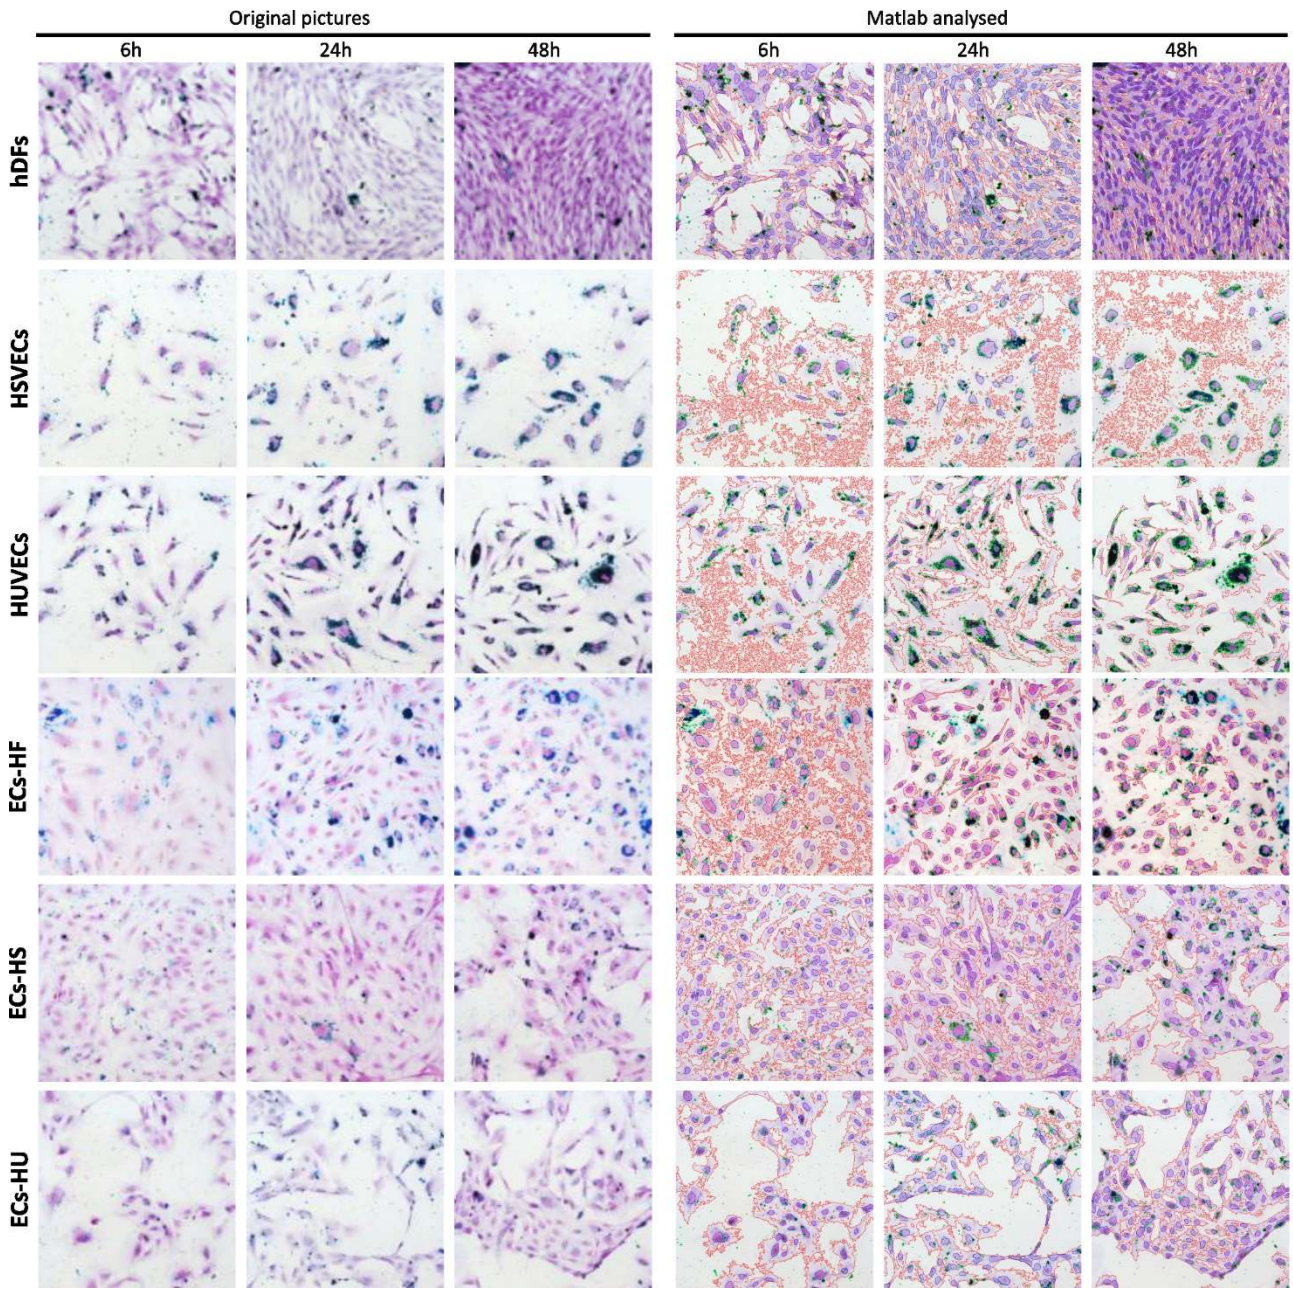

**Figure S4 Internalization of uSPIONs in 6 cell types, Matlab analysis.** Left - Representative pictures of internalization of uSPIONs visualized after Prussian blue staining. Cells were incubated with uSPIONs for 6 h, 24 h and 48 h, stained with Prussian blue for iron detection and observed under a light microscope. Right – Matlab analysis of internalization of uSPIONs visualized after Prussian blue staining. Analysis of number of uSPIONs inside the cell. Red lines – cell borders, green – uSPIONs. Abbreviations: HUVECs, human umbilical vein endothelial cells; HSVECs, human saphenous vein endothelial cells; hDFs, adult human dermal fibroblasts; ECs-HUs, endothelial cells differentiated from hiPSCs-HU; ECs-HS, endothelial cells differentiated from hiPSCs-HS; ECs-HF, endothelial cells differentiated from hiPSCs-HF.
